# Supplementary material for: ESP v2.0: enhanced method for exploring emission impacts of future scenarios in the United States – addressing spatial allocation
Source: Copernicus journal article supplement (doi:10.5194/gmd-8-1775-2015), 2015-06-17
Supplement: Supplementary file 1 [file gmd-8-1775-2015-supplement.zip]

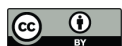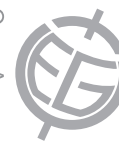

## *Supplement of*

# **ESP v2.0: enhanced method for exploring emission impacts of future scenarios in the United States – addressing spatial allocation**

**L. Ran et al.**

*Correspondence to:* D. H. Loughlin ([loughlin.dan@epa.gov](mailto:loughlin.dan@epa.gov))

- [gmd-8-1775-2015-supplement-cover-letter.pdf](#)
- [example\\_spatial\\_calculations.xlsx](#)

The copyright of individual parts of the supplement might differ from the CC-BY 3.0 licence.
